# Supplementary material for: Non-selective synthesis and controllable transformation of parallel MnO2 with hydrogen ions
Source: Royal Society of Chemistry journal article supplement (doi:10.1039/d0ce01032d), 2020-01-01
Supplement: d0ce01032d1.pdf [file d0ce01032d1.pdf]

# Supplementary Information for

## Non-Selective Synthesis and Controllable Transformation of Parallel

### MnO<sub>2</sub> under Hydrogen Ions

Ziyang Guo<sup>a, 1</sup>, Xin Fu<sup>a, b 1</sup>, Yuxin Zhang<sup>a\*</sup>, Ke Chen<sup>a\*</sup>

<sup>a</sup> College of Material Science and Engineering, Chongqing University, Chongqing, 400044, P.R. China.

<sup>b</sup> Sichuan Energy Internet Research Institute, Tsinghua University, 610000, Chengdu, Sichuan, China.

<sup>1</sup> These authors contributed equally to this work.

Corresponding author E-mail: [zhangyuxin@cqu.edu.cn](mailto:zhangyuxin@cqu.edu.cn);

## **Experimental section**

### ***Preparation templates of MnO<sub>m</sub>H<sub>n</sub> mesh***

The MnO<sub>m</sub>H<sub>n</sub> mesh was synthesized by a simple and improved hydrothermal method: 40 mL absolute ethanol, 0.06 g urea, 0.467 mL of 50 wt% Mn (NO<sub>3</sub>)<sub>2</sub> and 6 mL of 30 wt% H<sub>2</sub>O<sub>2</sub> were mixed in turn. After stirring at room temperature for 15 minutes, the mixture was transferred to a 50 mL stainless steel autoclave and heated to 120 °C for 24 h, Finally, the brown precipitate was collected by centrifugation and dried at 80 °C for 12 h.

### ***Effect of acid ions on parallel MnO<sub>2</sub>***

In a typical synthesis, 20 mg of the MnO<sub>m</sub>H<sub>n</sub> templates was dispersed in 0.01 mol L<sup>-1</sup> KMnO<sub>4</sub> solution (35 mL). Then, 20 μL of concentrated H<sub>2</sub>SO<sub>4</sub> was added, stirring slightly at room temperature, the solution was sealed in a 50 mL stainless steel autoclave and heated to 130 °C for 2 h. Following that the autoclave was quickly taken out from the oven and cool quickly with water to avoid further reaction of KMnO<sub>4</sub>. Finally, the brown precipitate was carefully washed and collected at 80 °C for 12 h (named as MnO<sub>2</sub>-S). As a contrast, HCl and HNO<sub>3</sub> were used to replace H<sub>2</sub>SO<sub>4</sub>. In detail, 25 μL of concentrated HCl was used and reacted at 120 °C for 2 h (denoted as MnO<sub>2</sub>-C); 46 μL of concentrated HNO<sub>3</sub> was employed and reaction at 120 °C reaction for 2 h (named as MnO<sub>2</sub>-N).

### ***Effect of H<sup>+</sup> and K<sup>+</sup> on parallel MnO<sub>2</sub>***

Our group has reported that a sufficient amount of H<sup>+</sup> can form needle-like MnO<sub>2</sub>. To investigate whether the effect of H<sup>+</sup> can be suppressed, the following experiments have been performed: First, 20 mg of the MnO<sub>m</sub>H<sub>n</sub> templates were dispersed in 0.01 mol L<sup>-1</sup> KMnO<sub>4</sub> solution (35 mL), then 400 μL concentrated H<sub>2</sub>SO<sub>4</sub> were added to obtain needle-like MnO<sub>2</sub> (named as MnO<sub>2</sub>-400). In order to inhibit the structural control of H<sup>+</sup>, K<sub>2</sub>SO<sub>4</sub> powder was added before concentrated H<sub>2</sub>SO<sub>4</sub>, and then stirred and dissolved to form a uniform solution. The amount of K<sub>2</sub>SO<sub>4</sub> powder was as follows C<sub>K<sup>+</sup></sub> = 0.5C<sub>H<sup>+</sup></sub>, C<sub>K<sup>+</sup></sub> = C<sub>H<sup>+</sup></sub>, C<sub>K<sup>+</sup></sub> = 3C<sub>H<sup>+</sup></sub>, the obtained samples are called as MnO<sub>2</sub>-0.5, MnO<sub>2</sub>-1 and MnO<sub>2</sub>-3, respectively.

### ***Effect of calcination on loading parallel MnO<sub>2</sub>***

Typically, the MnO<sub>m</sub>H<sub>n</sub> templates were calcined in a muffle furnace at 400 °C for 4 h (named as CMnO<sub>x</sub>); Then similar loading processes as without calcination were conducted expect for replacing MnO<sub>m</sub>H<sub>n</sub> with CMnO<sub>x</sub>, which named as CMnO<sub>x</sub>-2. For comparison, the hydrothermal time has also

been extended to 4 h, the obtained sample was called as CMnO<sub>x</sub>-4.

#### ***Characterization of parallel MnO<sub>2</sub>***

The nanostructures and morphology of as synthesized samples were characterized by focused ion beam scanning electron microscope (FIB / SEM, ZEISS AURIGA). The crystal information and chemical composition of the nanostructures were analyzed by powder X-ray diffraction (XRD, D / max 2500 copper K $\alpha$ ).

#### ***Electrochemical test of parallel MnO<sub>2</sub>***

In a Na<sub>2</sub>SO<sub>4</sub> solution (1.0 M), a three-electrode device was used to test the electrochemical performance. The prepared MnOmHn, CMnO<sub>x</sub> and CMnO<sub>x</sub>-2 nanopowders were used as working electrodes, respectively. Pt sheets were used as counter electrodes, and saturated calomel electrodes were served as reference electrodes. Typically, a slurry mixed by active materials (70%), carbon black (20%), and polyvinylidene fluoride (PVDF, 10%) in N-methyl-2-pyrrolidone. Then, the slurry was coated evenly on a nickel foam. The as-prepared electrode was put in vacuum oven at 120 °C overnight then uniaxially pressed under 10 MPa. The calculated current densities were based on the total mass of the active material, including the template and parallel MnO<sub>2</sub>.
